# Supplementary material for: Dose Prediction and Pharmacokinetic Simulation of XZP-5610, a Small Molecule for NASH Therapy, Using Allometric Scaling and Physiologically Based Pharmacokinetic Models
Source: MDPI journal article supplement (doi:10.3390/ph17030369), 2024-03-13
Supplement: s1 [file s1]

## 1. Calculation of hepatic clearance of XZP-5610

$$\%Remaining = \frac{\text{Peak area ratio of reference to internal standard at any point}}{\text{Peak area ratio of reference to internal standard at 0 min}} \times 100 \quad (1)$$

$$T_{1/2} = 0.693/k \quad (2)$$

$$CL_{int(hep)} = \frac{k}{\text{million cells/mL}} \quad (3)$$

$$CL_{int(liver)} = CL_{int(hep)} \times \text{cells per g liver} \times \text{Liver/Body weight} \quad (4)$$

Where  $k$  is the elimination rate constant, which was calculated as the slope of time against the logarithm of remaining.  $CL_{int(hep)}$  is the intrinsic clearance in hepatocytes,  $T_{1/2}$  is the half-life in hepatocytes.  $CL_{int(liver)}$  is the intrinsic clearance in liver. The parameters used for calculation were from references and listed as follow.

| Species    | Liver weight/body weight<br>(g/kg Body Weight) [22-23] | Liver blood flow (Qh)<br>(mL/min/kg) [22-23] | Hepatocytes content (of<br>cells/g liver) [24] |
|------------|--------------------------------------------------------|----------------------------------------------|------------------------------------------------|
| Mice       | 88                                                     | 90.0                                         | $135 \times 10^6$                              |
| Rat        | 40                                                     | 55.2                                         | $117 \times 10^6$                              |
| Beagle     | 32                                                     | 30.9                                         | $215 \times 10^6$                              |
| Cynomolgus | 30                                                     | 43.6                                         | $120 \times 10^6$                              |
| Human      | 20                                                     | 20.7                                         | $139 \times 10^6$                              |

## 2. Calculation of human $CL_{i.v}$ and $V_{ss}$ of XZP-5610

The calculation methods of  $CL_{i.v}$  were as follows:

Single-species scaling method:

$$CL_{i.v,h} = a \times CL_{i.v,a} \times \frac{BW_h}{BW_a} \quad (5)$$

Single species allometric scaling method:

$$CL_{i.v,h} = \frac{CL_{i.v,a}}{f_{u,a}} \times \frac{BW_h^{0.75}}{BW_a} \times f_{u,h} \quad (6)$$

Two species allometric scaling method:

$$CL_{i.v,h} = b \times BW_h^{0.628} \quad (7)$$

$f_u$  corrected intercept method:

$$CL_{i.v,h} = 33.35 \times \frac{b}{Rf_{up}}^{0.77} \times \text{mL/min} \quad (8)$$

Hepatic blood flow method:

$$CL_{i.v,h} = CL_{i.v,a} \times \frac{Q_h}{Q_a} \quad (9)$$

Where  $CL_{i.v,h}$  represents human intravenous clearance rate;  $CL_{i.v,a}$  represents animal intravenous clearance rate;  $BW_h$  represents human body weight, which is 60 kg;  $BW_a$  represents animal body weight, for SD rat is 0.245 kg, and for beagle dog is 7.21 kg;  $a$  represents the allometric scaling factor, for SD rat is 0.152, and for beagle dog is 0.41;  $b$  represents the intercept, which is calculated based on the regression of  $\ln(CL)$  and  $\ln(WT)$  from different animal species experiments, in this study it was 13.40 as

calculated;  $f_{u,a}$  represents animal plasma free fraction;  $f_{u,h}$  represents human plasma free fraction;  $Rf_{up}$  represents the ratio of animal plasma free fraction to human plasma free fraction;  $Q_h$  is the hepatic blood flow for humans, which is 1450 mL/min;  $Q_a$  is the hepatic blood flow for animals, which is 13.5 mL/min for SD rat and 222.8 mL/min for beagle dog.

The calculation methods of  $V_{ss}$  were as follows:

Single-species scaling method:

$$V_{ss,h} = a \times V_{ss,a} \times \frac{BW_h}{BW_a} \quad (10)$$

Øie-Tozer method:

$$V_{ss,h} = V_p \times (1 + R_{E/I}) + f_{up} \times V_p \times \left( \frac{V_E}{V_p} - R_{E/I} \right) + \frac{V_R \times f_{up}}{f_{ut}}$$

where  $f_{up}$  is the fraction unbound in plasma,  $f_{ut}$  is the fraction unbound in tissues, and  $R_{E/I}$  is the extravascular/intravascular ratio of binding proteins (usually 1.4 for albumin).  $V_p$ ,  $V_E$ , and  $V_R$  refer to the volumes of plasma, extracellular fluid, and remainder fluid with values of 0.0436, 0.151, and 0.38 L/kg in humans; 0.0313, 0.265, and 0.364 L/kg in rats; 0.0515, 0.216, and 0.450 L/kg in dogs, respectively. This equation was rearranged to express  $f_{ut}$  in terms of  $V_{ss}$  and  $f_{up}$  as follows:

$$f_{ut} = \frac{V_R \times f_{up}}{[V_{ss} - V_p - (f_{up} \times V_E)] - [(1 - f_{up}) \times R_{E/I} \times V_p]}$$

The average  $f_{ut}$  of SD rats and beagle dogs were used as human  $f_{ut}$ .

### 3. Calculation of recommended doses of XZP-5610 in FIH clinical trial

Exposure-based method:

$$HED = AUC_{0-24h} \times \frac{f_{ua}}{f_{u,h}} \times \frac{CL_{i.v,h}}{F_a} \quad (11)$$

$$MRSD = HED \times SF \quad (12)$$

Where  $AUC_{0-24h}$  represents animal steady-state AUC,  $f_{u,a}$  represents animal plasma free fraction,  $f_{u,h}$  represents human plasma free fraction,  $CL_{i.v,h}$  represents human intravenous clearance rate,  $F_a$  represents animal bioavailability.  $SF$  is set as 10 in this study.

Body surface area-based method:

$$HED = NOAEL_a \times K \times BW_h \quad (13)$$

Where  $NOAEL_a$  represents animal No Observed Adverse Effect Level,  $K$  represents coefficient, for rat is 0.16 and for monkey is 0.54,  $BW_h$  represents human body weight, which is 60 kg.

**Table S1 Dose of XZP-5610 administrated to SPF SD rats in different groups in toxicity studies**

| Type of study                  | Administrated dose (mg/kg) |                    |                       |                     |
|--------------------------------|----------------------------|--------------------|-----------------------|---------------------|
|                                | Group 1 (control)          | Group 2 (low dose) | Group 3 (medium dose) | Group 4 (high dose) |
| Acute toxicity                 | 0                          | 500                | 1000                  | 2000                |
| long-term toxicity<br>(Male)   | 0                          | 1.5                | 4.5                   | 15                  |
| long-term toxicity<br>(Female) | 0                          | 1                  | 3                     | 10                  |

**Table S2 Dose of XZP-5610 administrated to beagle dogs in different groups in toxicity studies**

| Type of study      | Administrated dose (mg/kg) |                    |                       |                     |
|--------------------|----------------------------|--------------------|-----------------------|---------------------|
|                    | Group 1 (control)          | Group 2 (low dose) | Group 3 (medium dose) | Group 4 (high dose) |
| Acute toxicity     | 0                          | 125                | 250                   | 500                 |
| long-term toxicity | 0                          | 0.05               | 0.2                   | 0.8                 |

**Table S3 Half-life, intrinsic clearance and hepatic clearance of XZP-5610 in different species hepatocytes**

| Species           | T <sub>1/2</sub> (min) | CL <sub>int</sub> (hep) (μL/min/10 <sup>6</sup> cells) | CL <sub>int</sub> (liver) (mL/min/kg) | CL(liver) (mL/min/kg) |
|-------------------|------------------------|--------------------------------------------------------|---------------------------------------|-----------------------|
| CD-1 mice         | 15.5                   | 44.8                                                   | 532.3                                 | 77.0                  |
| SD rat            | 17.8                   | 38.8                                                   | 181.7                                 | 42.3                  |
| Beagle dog        | 123.8                  | 5.6                                                    | 38.5                                  | 17.1                  |
| Cynomolgus monkey | 78.2                   | 8.9                                                    | 31.9                                  | 18.5                  |
| Human             | 60.0                   | 11.6                                                   | 32.1                                  | 12.6                  |

**Table S4 Metabolites information of XZP-5610 in different species of hepatocytes**

| Name   | Retention time (min) | Abundance (UV area%) |        |            |                   |       |
|--------|----------------------|----------------------|--------|------------|-------------------|-------|
|        |                      | CD-1 mice            | SD rat | Beagle dog | Cynomolgus monkey | Human |
| Parent | 50.16                | 0.24                 | 88.56  | 85.97      | 80.38             | 87.30 |
| M1     |                      | ND                   |        |            |                   |       |
| M2     | 21.79                | 1.80                 | 0.20   | 0.22       | 0.12              | 0.12  |
| M3     | 33.09                | ND                   | ND     | ND         | 0.08              | 0.95  |
| M4     | 43.57                | 0.22                 | 3.39   | 0.57       | 0.85              | 1.82  |
| M5     | 40.17                | ND                   | 3.83   | 12.74      | 17.91             | 9.78  |
| M6     |                      |                      |        |            |                   |       |
| M7     | 36.01                | 0.19                 | +      | +          | +                 | +     |
| M8     | 38.46                | 0.68                 | 2.58   | ND         | 0.66              | 0.03  |
| M9     | 29.29                | 4.26                 | ND     | ND         | ND                | ND    |
| M10    | 29.78                | 7.15                 | ND     | +          | +                 | ND    |

|     |       |       |      |      |    |    |
|-----|-------|-------|------|------|----|----|
| M11 | 30.61 | 0.79  | ND   | ND   | +  | ND |
| M12 | 32.61 | 65.77 | 1.43 | 0.50 | ND | ND |
| M13 | 30.01 | 1.43  | ND   | ND   | ND | ND |
| M14 | 35.23 | 4.48  | ND   | ND   | ND | ND |
| M15 | 28.11 | 12.97 | ND   | ND   | ND | ND |
| M16 |       |       |      |      |    |    |

The data in the table represents semi-quantitative measurements of peak area at UV (315 nm);

+: Can be detected in MS and can't be detected in UV;

ND: not detected;

The peak of XZP-5610 and M1, M5 and M6, and M15 and M16 could not be separated in the LC-UV and the total abundance were presented in the table. The response of XZP-5610 in MS was 100 times higher than M1, so the main constitute in peak XZP-5610 and M1 should be the parent drug XZP-5610.

**Table S5 Pharmacokinetic parameters after single administration of [<sup>14</sup>C]XZP-5610 in rats**

| Tissue    | T <sub>max</sub> (h) | C <sub>max</sub> (ng Eq/g) | AUC <sub>0-t</sub> (h.ng Eq/g) |
|-----------|----------------------|----------------------------|--------------------------------|
| Fat       | 0.5                  | 65.9                       | 500                            |
| Heart     | 0.5                  | 243                        | 1249                           |
| Lung      | 0.5                  | 304                        | 724                            |
| Kidney    | 0.5                  | 547                        | 3430                           |
| Liver     | 0.5                  | 13414                      | 32765                          |
| Stomach   | 0.5                  | 25175                      | 56295                          |
| Intestine | 2                    | 6343                       | 63911                          |
| Plasma    | 0.5                  | 903                        | 2722                           |
| Blood     | 0.5                  | 486                        | 972                            |

**Table S6 Body weight and biochemistry parameters changes in long-term toxicity studies of XZP-5610 in rats**

| Parameter <sup>1</sup> | Male (mg/kg) <sup>2</sup> |        |         | Female (mg/kg) |       |        |
|------------------------|---------------------------|--------|---------|----------------|-------|--------|
|                        | 1.5                       | 4.5    | 15      | 1              | 3     | 10     |
| Body weight            |                           |        | 4.7%↓   |                |       |        |
| ALB                    | 12.7%↑                    | 15.1%↑ | 22.5%↑  | 6.7%↑          | 7.6%↑ | 10.5%↑ |
| A/G                    | 7.0%↑                     | 6.1%↑  | 7.8%↑   |                |       |        |
| ALP                    | 49.0%↑                    | 76.7%↑ | 149.2%↑ |                |       | 88.7%↑ |
| TP                     | 8.5%↑                     | 11.1%↑ | 17.6%↑  |                |       | 10.1%↑ |
| TCHO                   | 40.3%↑                    |        | 61.2%↑  |                |       | 34.0%↑ |
| HDL                    | 42.4%↑                    | 65.4%↑ | 64.1%↑  |                |       | 37.6%↑ |
| LDL                    | 45.6%↑                    | 44.9%↑ | 77.9%↑  |                |       |        |

<sup>1</sup>: Serum biochemical indicators with statistical differences;

<sup>2</sup>: The changes percentage compared to the control group.

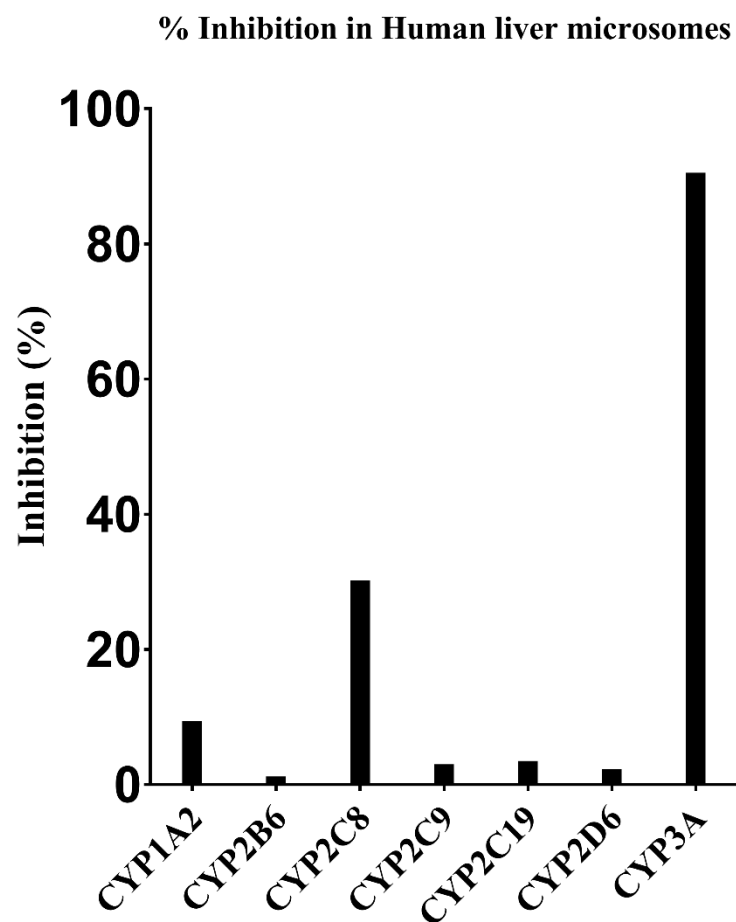

**Figure S1 Inhibition of the metabolism of XZP-5610 in human liver microsomes by specific chemical inhibitors.** Accordingly, the metabolism of XZP-5610 was not influenced by the inhibitors of CYP1A2, CYP2B6, CYP2C9, CYP2C19, and CYP2D6. Meanwhile, the metabolism of XZP-5610 could be slightly inhibited by the specific inhibitor of CYP2C8 and could be significantly inhibited by CYP3A inhibitor.
